# Supplementary material for: Modular evolution of secretion systems and virulence plasmids in a bacterial species complex
Source: PubMed Central journal article supplement (PMC8756689; doi:10.1186/s12915-021-01221-y), 2022-01-13
Supplement: 12915_2021_1221_MOESM1_ESM.pdf [file 12915_2021_1221_MOESM1_ESM.pdf]

## Supplementary Information

### Additional File 1: Figures S1-S9

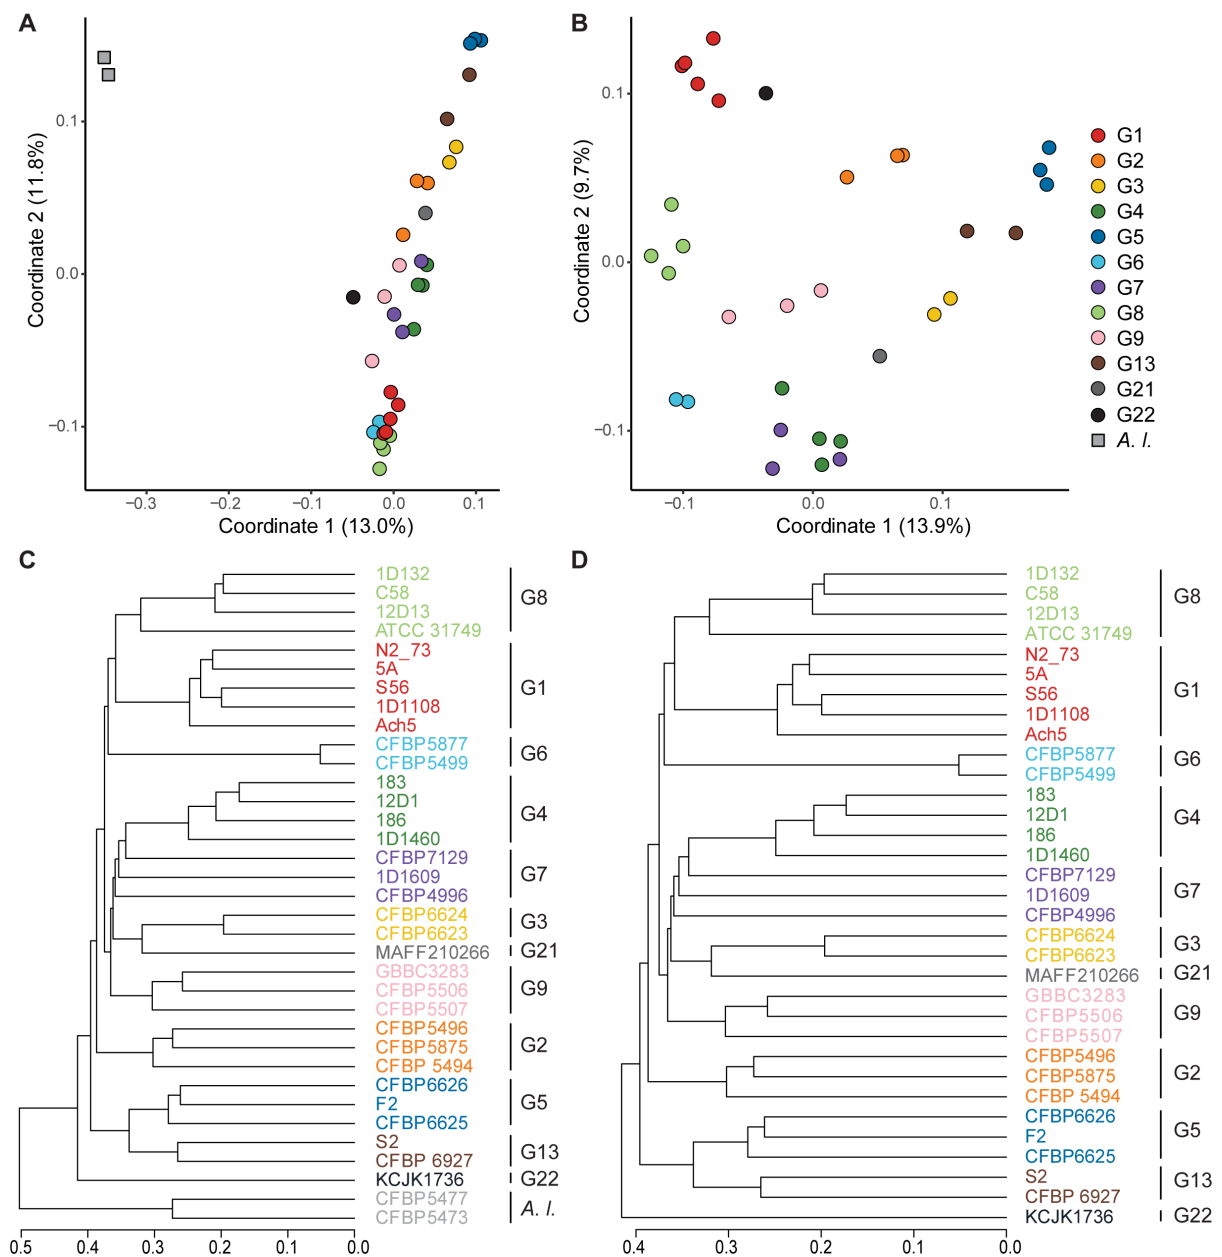

**Figure S1.** Gene content dissimilarity among the *Agrobacterium* genomes. (A) and (B): principal coordinate analysis with and without the outgroup *A. larrymoorei*, respectively. The % variance explained by each axis is provided in parentheses. (C) and (D): hierarchical clustering with and without the outgroup *A. larrymoorei*, respectively.

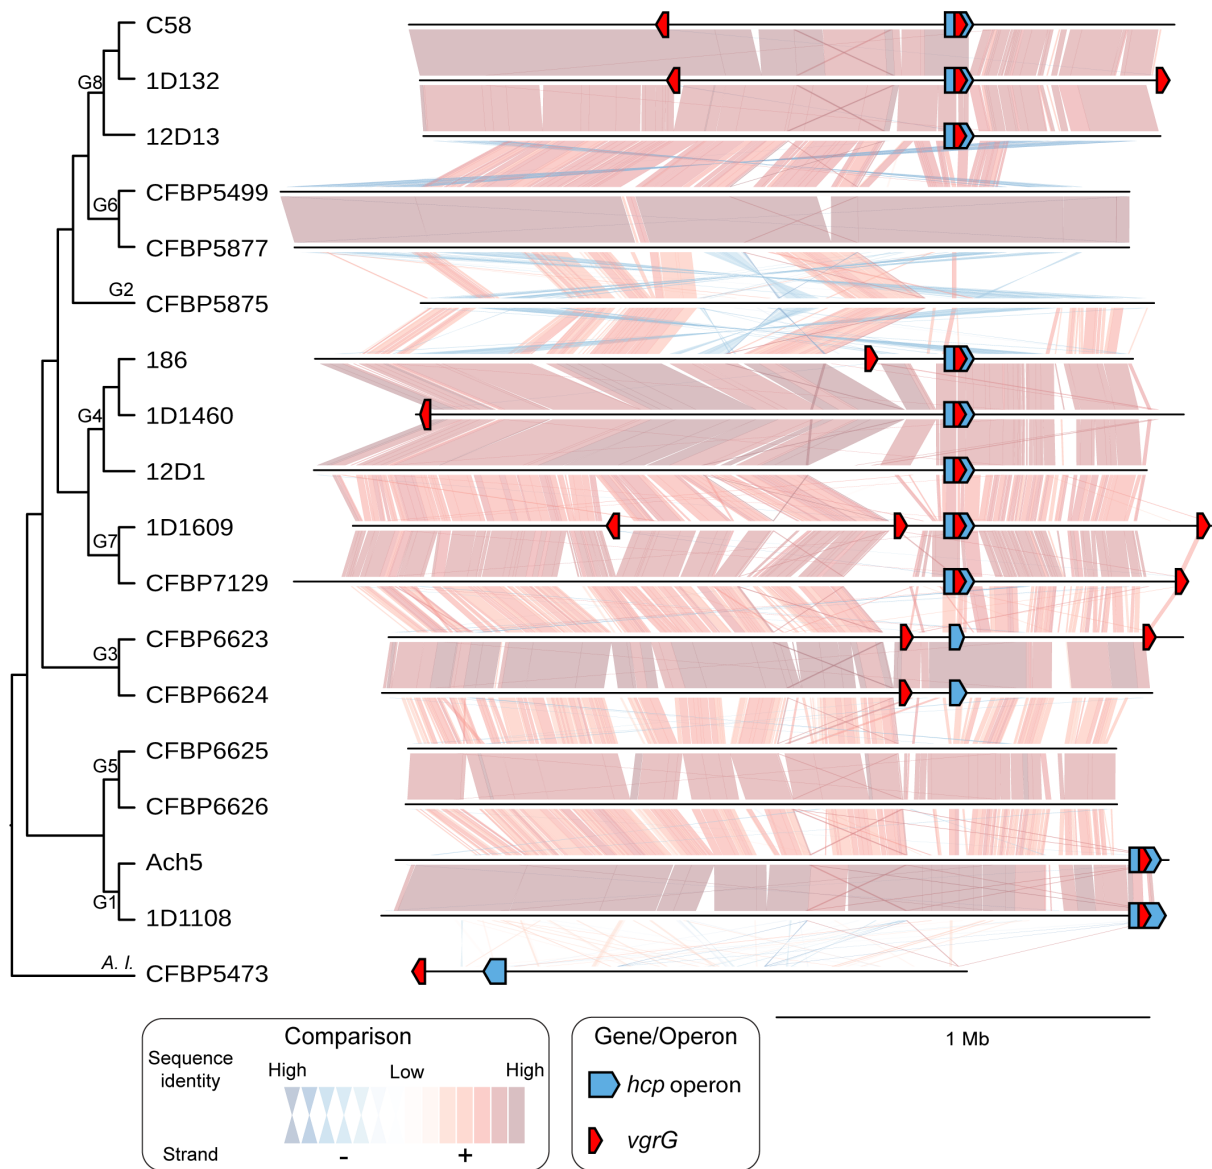

**Figure S2.** Global alignment of the linear chromosomes. Locations of T6SS-*hcp* operons and *vgrG* homologs are labeled.

**Domain 1 (538 a.a.; 44/44; TIGR03361)**

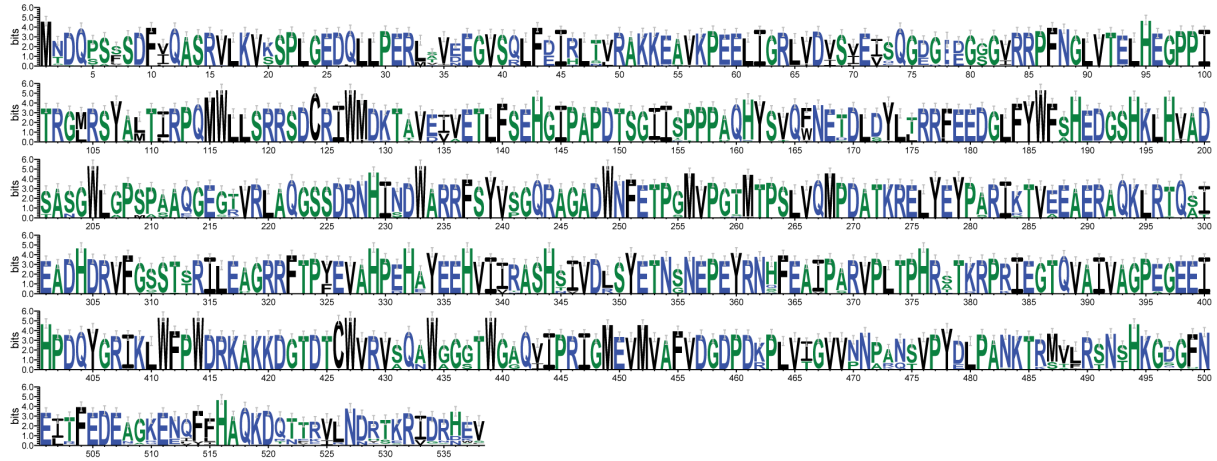

**Domain 2 (42 a.a.; 44/44)**

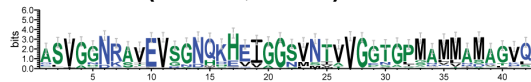

**Domain 3 (59 a.a.; 44/44)**

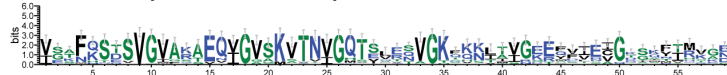

**Domain 4 (67 a.a.; 32/44)**

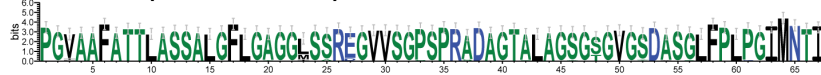

**Domain 5 (42 a.a.; 20/44)**

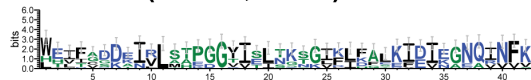

**Domain 6 (30 a.a.; 8/44)**

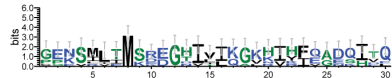

**Domain 7 (117 a.a.; 3/44)**

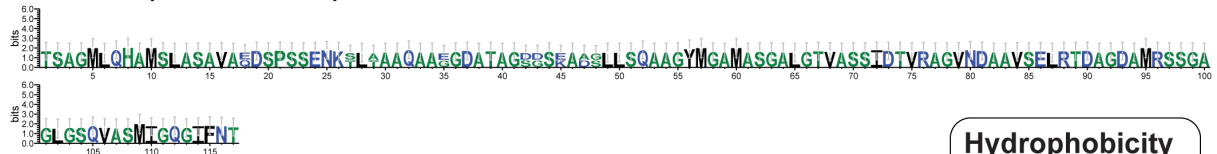

**Domain 8 (42 a.a.; 2/44)**

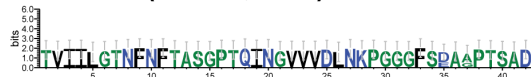

**Hydrophobicity**  
Hydrophilic  
Neutral  
Hydrophobic

**Figure S3.** Logo plots of the putative protein domains identified among *vgrG* homologs. For each domain, the length and the number of homologs with the domain is labeled. Domain 1 is the only domain with a corresponding database entry (TIGR03361).

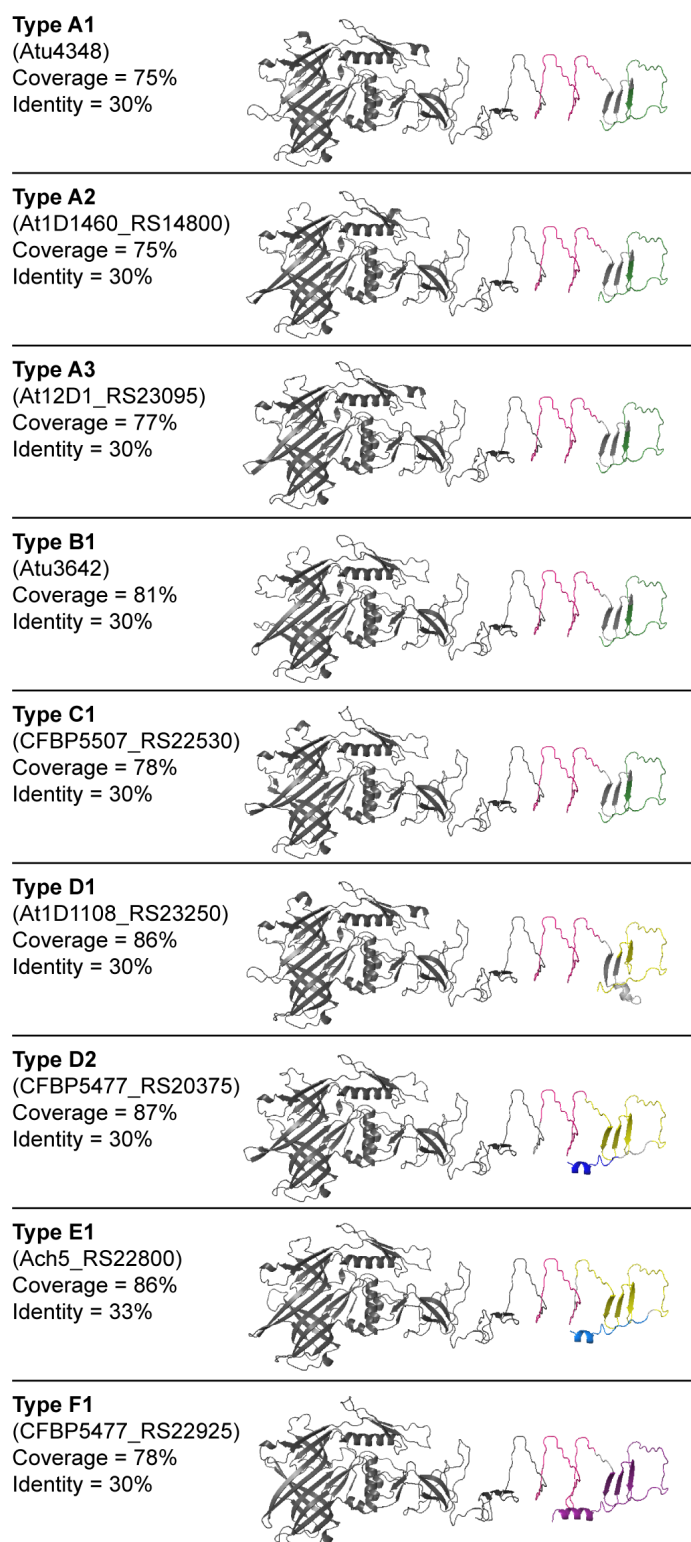

**Figure S4.** Predicted structures of VgrG homologs. Regions are colored according to the scheme used in the domain analysis (**Figure. 3**). The chain D of PA0091 VgrG1 (PDB identifier: 4MTK) from *Pseudomonas aeruginosa* was selected as the template. The C-terminal parts that could not be confidently inferred are omitted. In all cases, the coverage (i.e., percentage of the sequence included in the structure prediction) are at least 75%, the sequence identity to the template is at least 30% and the confidence score is 100%.

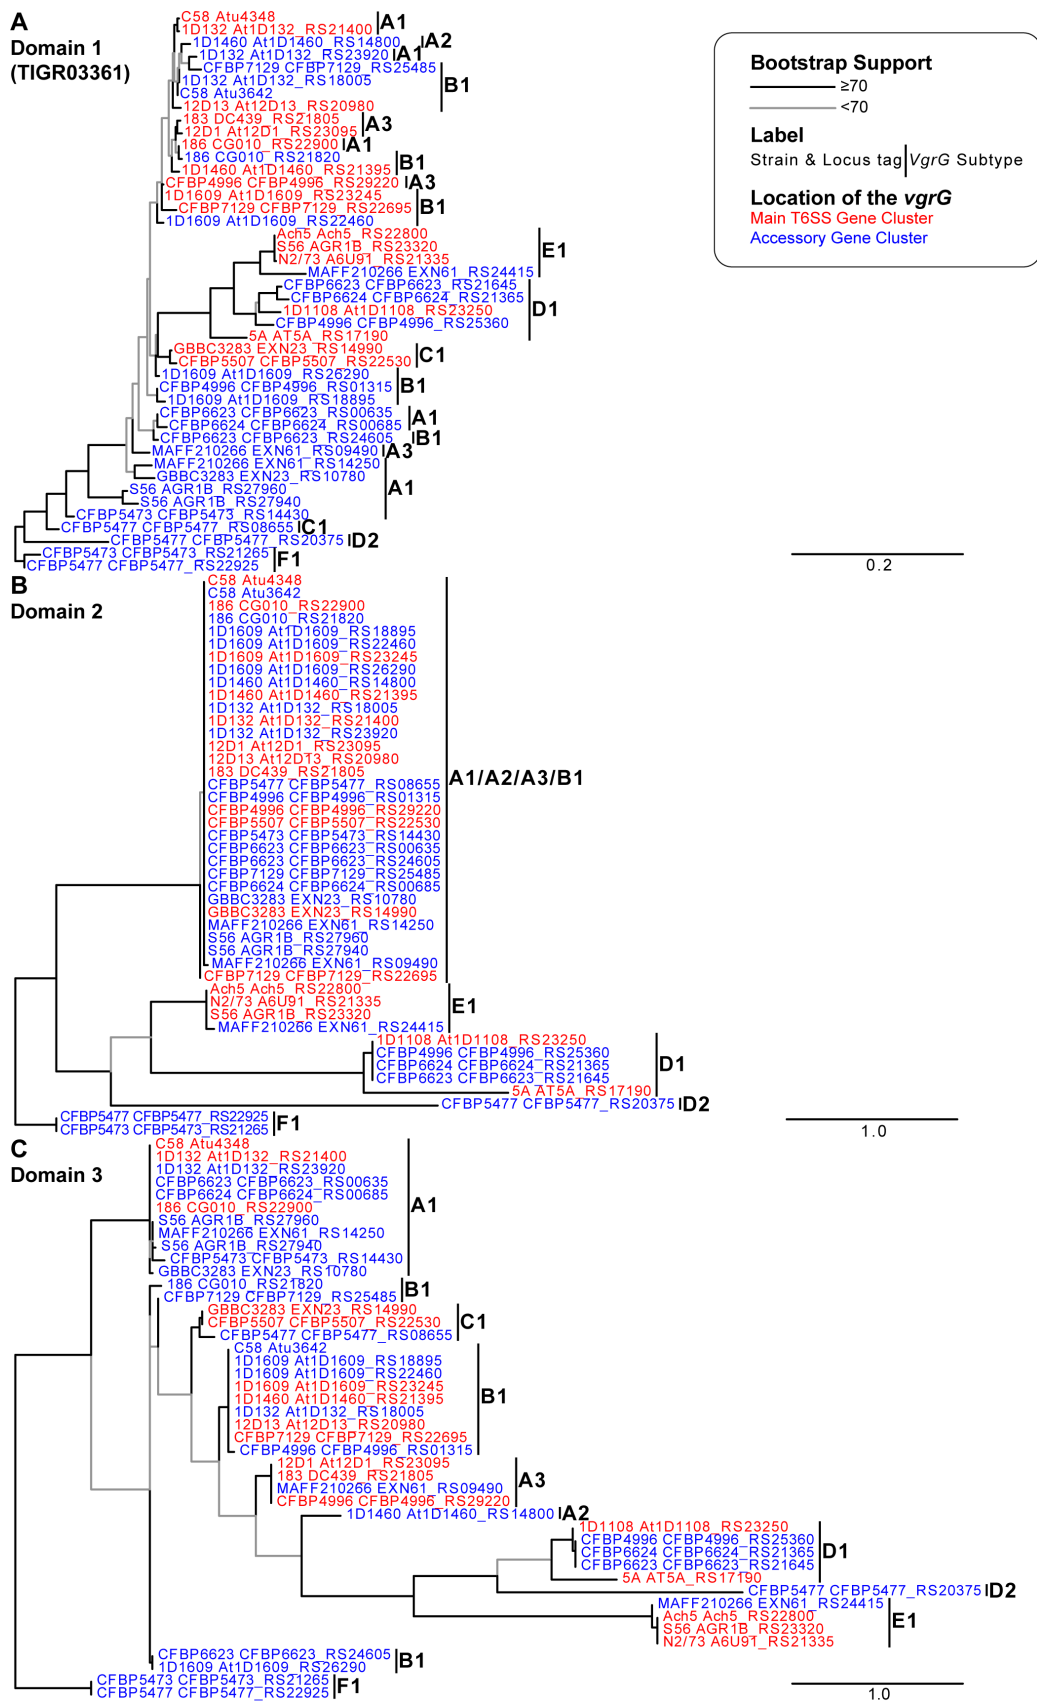

**Figure S5.** Maximum likelihood phylogenies of *vgrG*-associated domains. (A) Domain 1 (TIGR03361; VI\_Rhs\_Vgr super family), (B) Domain 2 (unknown function), and (C) Domain 3 (unknown function).

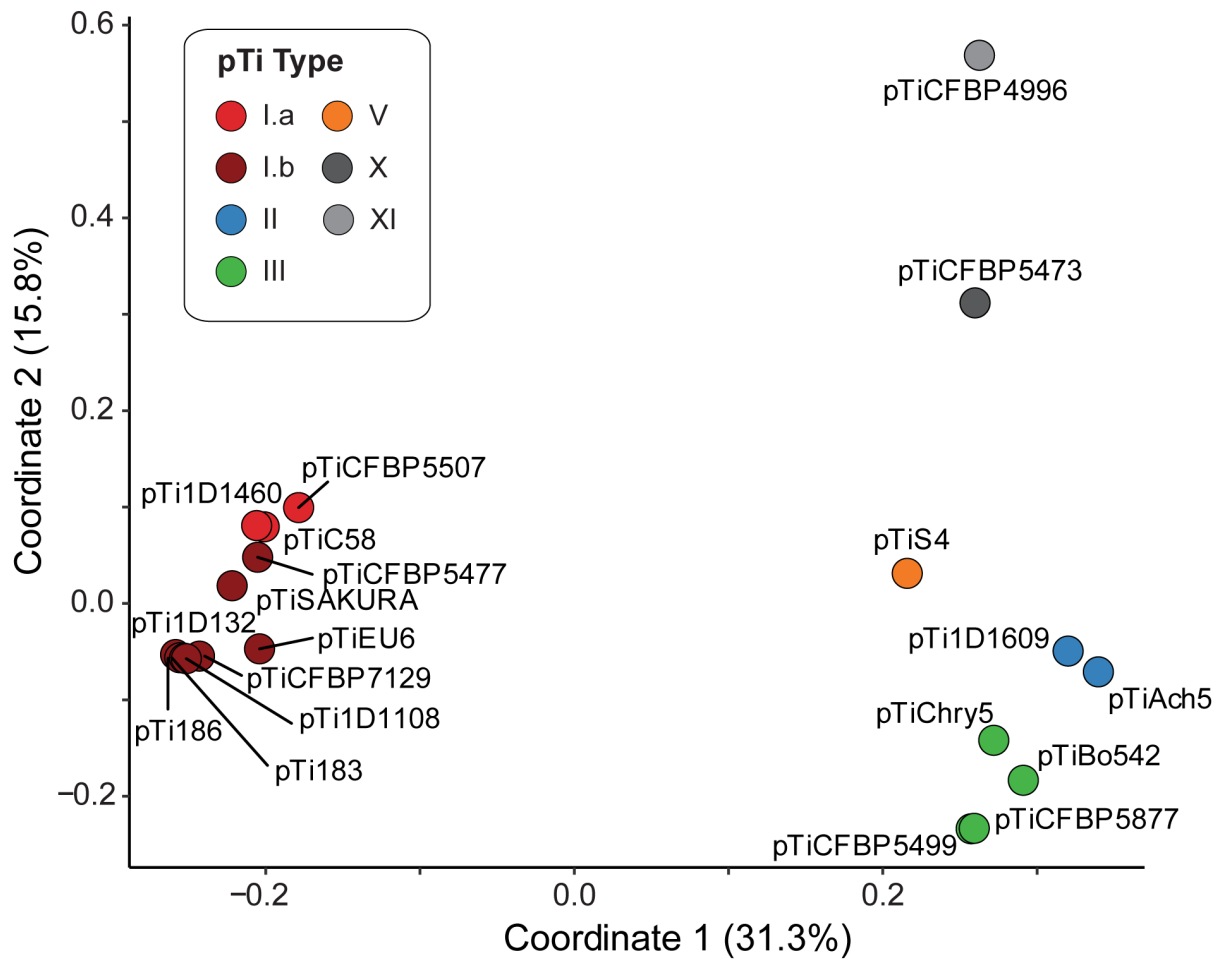

**Figure S6.** Principal coordinate analysis of gene content among the putative pTi analyzed.

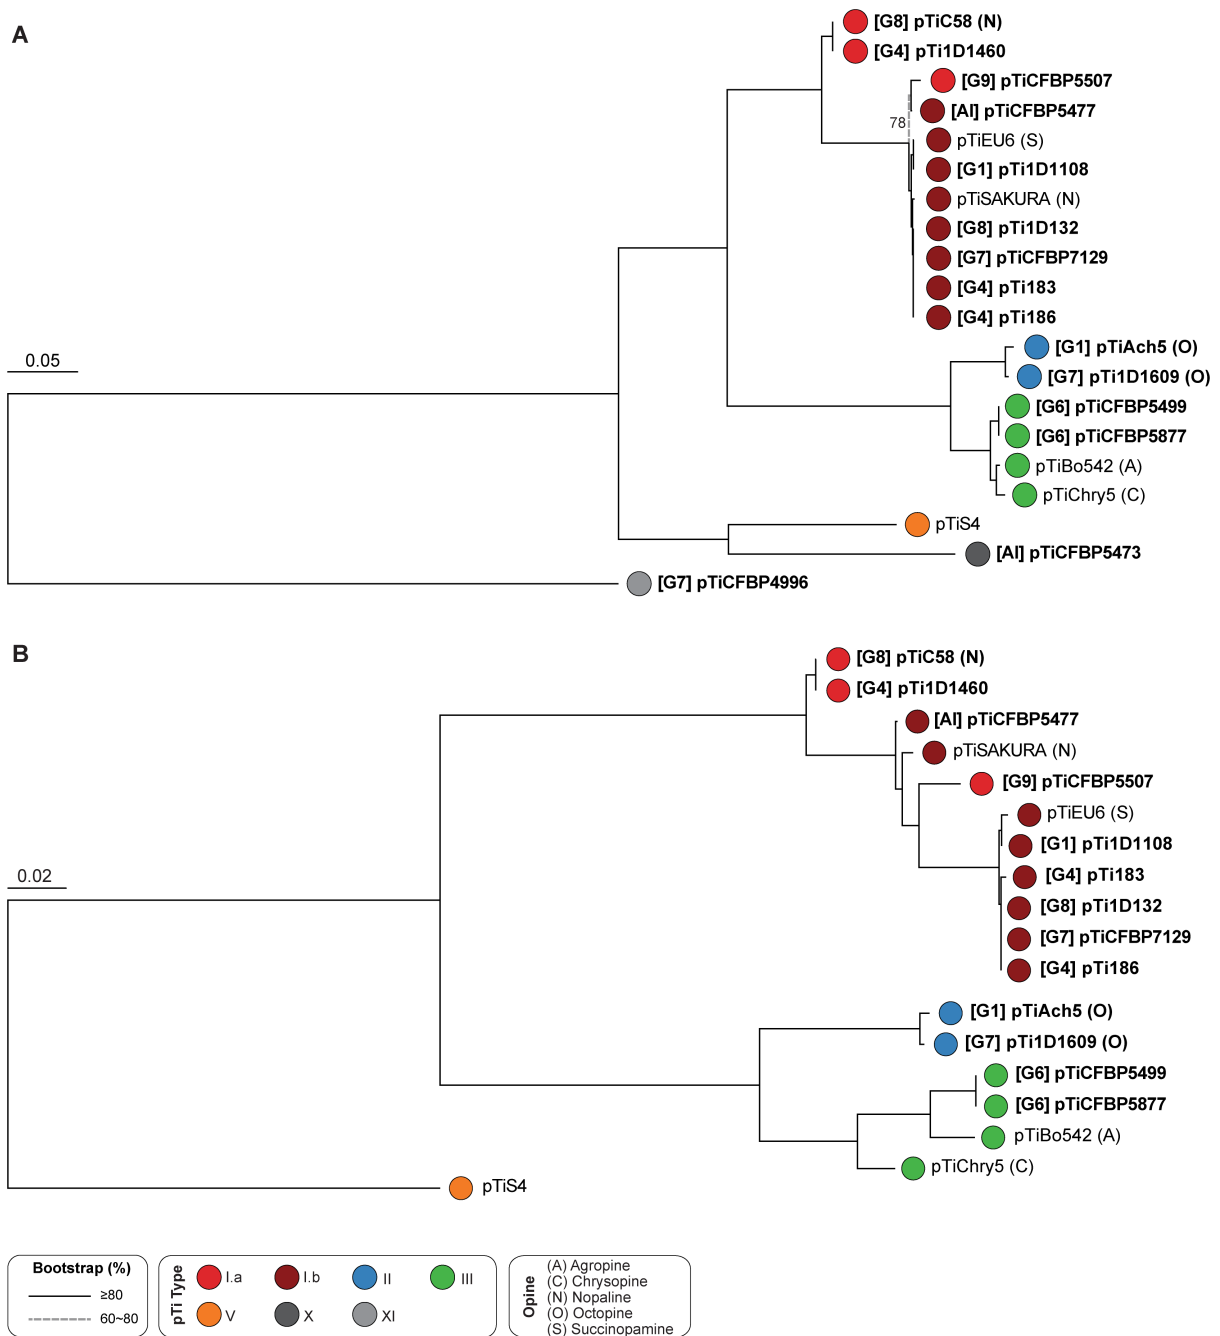

**Figure S7.** Maximum likelihood phylogeny of pTi based on the concatenated alignment of shared single-copy genes. (A) All of the 20 pTi sequences analyzed; 21 core genes and 8,534 aligned amino acid sites. (B) Excluding the two novel pTi; 40 core genes and 15,473 aligned amino acid sites, all branches received > 80% bootstrap support.

**A**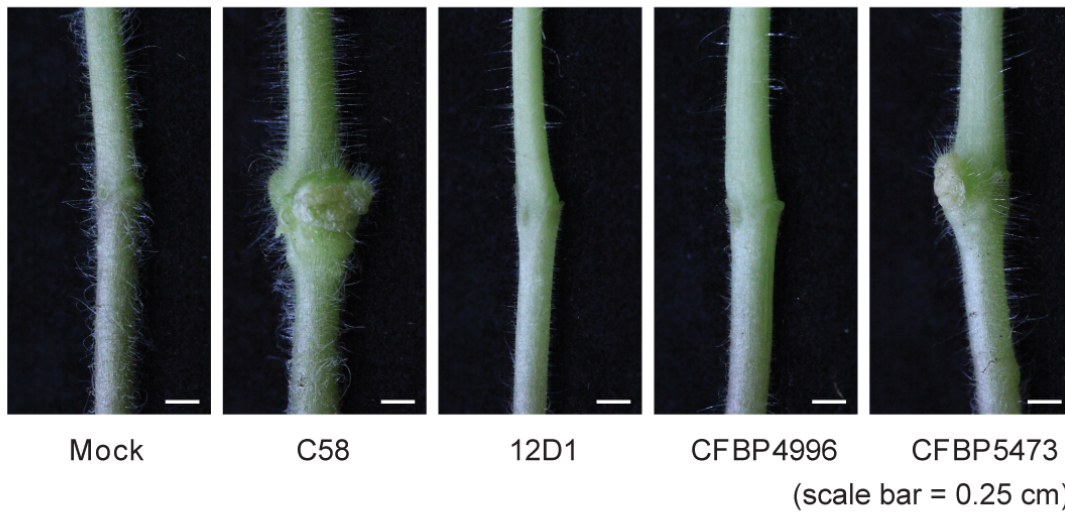**B**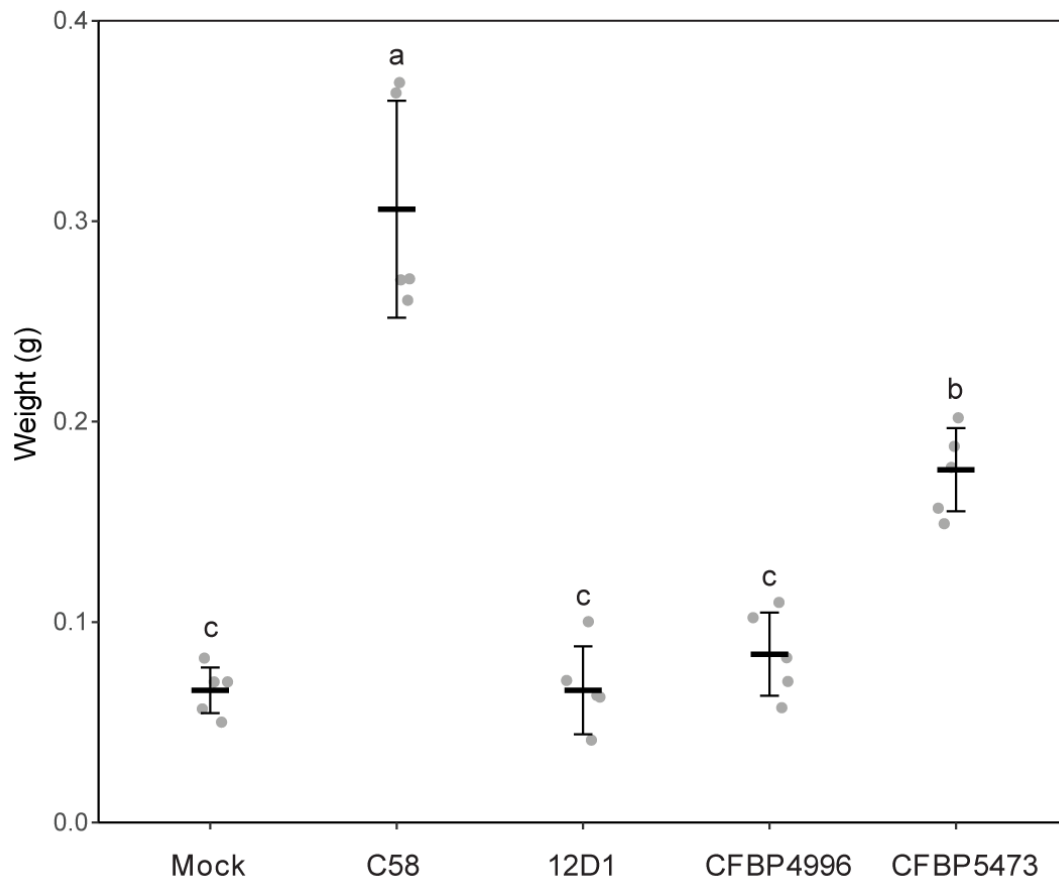

**Figure S8.** Tomato tumor assay of strains 12D1, CFBP4996, and CFBP5473. Mock was inoculated with sterilized water as a negative control and strain C58 was included as a positive control. Strain 12D1 harbors a plasmid with opine transporter and catabolism genes but lacks *vir* regulon genes and identifiable T-DNA. CFBP4996 and CFBP5473 harbor novel types of putative tumor-inducing plasmids (pTi). (A) Tomato stems at three weeks after inoculation. Scale bar: 0.25 cm. (B) Weight distribution of five biological replicates (1-cm segments of the stem centered at the inoculation site). The letters indicate ANOVA results.



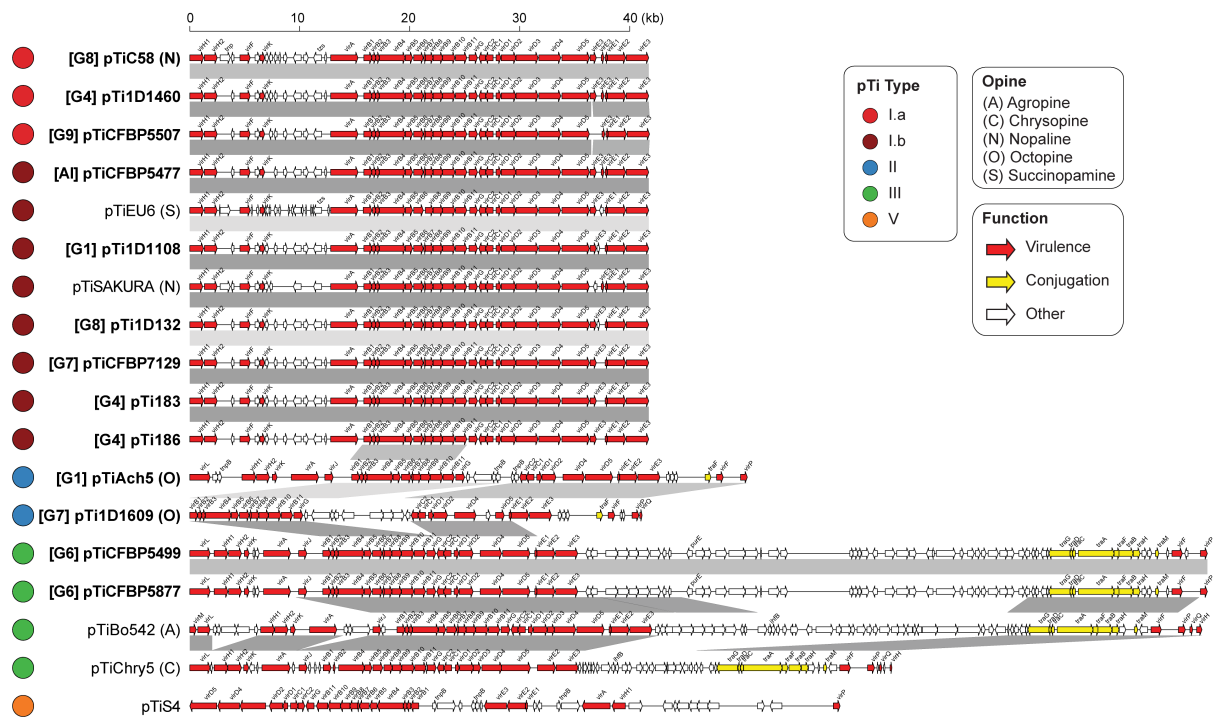

**Figure S9.** Gene organization of the *vir* regulons on pTi. Syntenic regions are indicated by grey blocks. The virulence (*vir*) genes are highlighted in red, the conjugation (*tra*) genes are highlighted in yellow, and other genes are plotted in white.
